# Supplementary material for: Core Element Cloning, Cis-Element Mapping and Serum Regulation of the Human EphB4 Promoter: A Novel TATA-Less Inr/MTE/DPE-Like Regulated Gene
Source: MDPI journal article supplement (doi:10.3390/genes10120997), 2019-12-02
Supplement: s1 [file s1]

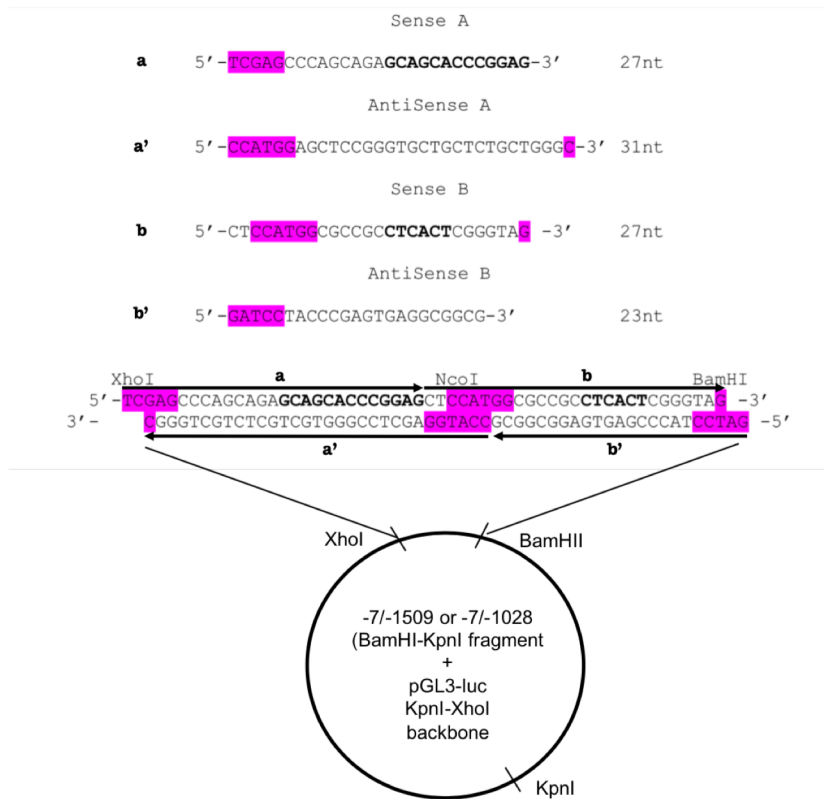

**Supplementary Figure 1.** Cloning strategy of human EphB4 core promoter elements. . “Sticky ends” partially complementary synthetic oligo pairs (a/a’ and b/b’) with sequence spanning the region corresponding to the nt +40/-10 of the human EphB4 promoter were used for double semi-complementary annealing by temperature denaturation/renaturation followed by a triple fragments ligation to reconstitute the EphB4 genomic sequence conveyed in the Luc-reporter constructs +40/-1028 and +40/-1509 used in this study.
